# Supplementary material
Source: publisher site journal article supplement (https://www.dovepress.com/article/412106)
Supplement: Supplementary file 1 [file get_supplementary_file.php]

**Supplementary Table S1 Baseline characteristics stratified by the BUN**

| **Patients characteristics** | **BUN≥7.3(mmol/L)**  **(n=3762)** | | **BUN<7.3(mmol/L)**  **(n=9669)** | **P value** |
| --- | --- | --- | --- | --- |
| **General information** | |  |  |  |
| Age (years) | | 75.42±9.92 | 71.03±10.30 | <0.001 |
| Gender | |  |  | 0.125 |
| Male | | 2995(79.6) | 7581(78.4) |  |
| Female | | 767(20.4) | 2088(21.6) |  |
| BMI (kg/m2) | | 21.67±4.21 | 21.54±4.03 | 0.231 |
| Smoking history a | |  |  | <0.001 |
| Never | | 1517(40.9) | 3538(37.2) |  |
| Current | | 645(17.4) | 1927(20.3) |  |
| Former | | 1547(41.7) | 4045(42.5) |  |
| Frequency of hospitalization  due to AECOPD in the past year b | | |  | 0.085 |
| ≥2 | | 447(31.0) | 1209(28.6) |  |
| <2 | | 996(69.0) | 3020(71.4) |  |
| **Comorbidities, n (%)** | |  |  |  |
| Hypertension | | 1525(40.5) | 2954(30.6) | <0.001 |
| Diabetes | | 647(17.2) | 1060(11.0) | <0.001 |
| Malignancy | | 180(4.8) | 513(5.3) | 0.220 |
| Pulmonary tuberculosis | | 142(3.8) | 470(4.9) | 0.007 |
| Bronchiectasis | | 273(7.3) | 879(9.1) | 0.001 |
| Pulmonary hypertension | | 147(3.9) | 245(2.5) | <0.001 |
| OSAHS | | 17(0.5) | 65(0.7) | 0.141 |
| Pneumonia | | 894(23.8) | 2070(21.4) | 0.003 |
| Heart failure | | 757(20.1) | 754(7.8) | <0.001 |
| Renal dysfunction | | 399(10.6) | 81(0.8) | <0.001 |
| Number of comorbidities, n (%) | |  |  | <0.001 |
| 0 | | 1011(26.9) | 3762(38.9) |  |
| 1 | | 1257(33.4) | 3459(35.8) |  |
| 2 | | 821(21.8) | 1713(17.7) |  |
| >2 | | 673(17.9) | 735(7.6) |  |
| **Vital signs at admission** | | |  |  |
| Pulse rate (beats/min) | | 88.93±17.99 | 89.22±16.07 | 0.388 |
| Respiratory rate (breaths/min) | | 21.00±2.68 | 20.81±2.09 | <0.001 |
| SBP (mmHg) | | 132.19±20.85 | 131.98±18.78 | 0.594 |
| DBP (mmHg) | | 78.05±13.41 | 79.16±12.19 | <0.001 |
| **Laboratory findings** | |  |  |  |
| PaO2 (mmHg) | | 83.3(67.3-108.3) | 83.0(68.6-105.·1) | 0.020 |
| PaCO2 (mmHg) | | 42.4(35.2-52.9) | 42.1(36.5-50.5) | 0.017 |
| Lactic acid (mmol/L) | | 1.6(1.3-2.1) | 1.5(1.2-1.9) | <0.001 |
| Hemoglobin (g/L) | | 123.22±25.36 | 129.00±20.89 | <0.001 |
| WBC (*109/L) | | 8.45(6.28-11.60) | 7.45(5.77-9.63) | <0.001 |
| Eosinophil percentage (%) c | |  |  | <0.001 |
| ≥2% | | 919(24.9) | 3441(36.0) |  |
| <2% | | 2777(75.1) | 6116(64.0) |  |
| Uric acid (µmol/L) | | 369(272-478) | 283(212-361) | <0.001 |
| NT-proBNP (pg/ml) | | 953(251-3556) | 221(81-757) | 0.235 |
| D- dimer (mg/L) | | 1.02(0.55-2.18) | 0.64(0.37-1.27) | <0.001 |
| Fibrinogen (g/L) | | 3.81(2.86-5.09) | 3.89(3.01-5.09) | 0.394 |
| **Regular medication** | |  |  |  |
| Inhaled/nebulized bronchodilators in the past 3 months (n, %) d | | 429(85.8) | 1374(88.8) | 0.070 |
| Inhaled/nebulized corticosteroids in the past 3 months (n, %) e | | 308(77.4) | 996(80.5) | 0.176 |
| **Clinical outcome** | |  |  |  |
| In-hospital mortality, n (%) | | 123(3.3) | 50(0.5) | <0.001 |
| Length of hospital stay (days) | | 10(7-15) | 9(6-13) | <0.001 |
| Invasive ventilation, n (%) | | 248(6.6) | 168(1.7) | <0.001 |
| ICU admission, n (%) | | 468(12.4) | 500(5.2) | <0.001 |

Abbreviations: AECOPD=acute exacerbation of chronic obstructive pulmonary disease; BMI=body mass index; SBP= Systolic blood pressure; DBP = Diastolic blood pressure; OSAHS=Obstructive sleep apnea-hypopnea syndrome; PaO2= Partial pressure of oxygen; PaCO2=Partial pressure of carbon dioxide;WBC = white blood cell; BUN=blood urea nitrogen; NT-proBNP=N-terminal pro-B-type natriuretic peptide; ICU=intensive care unit

a Available in 13219 patients

b Available in 5672 patients

c Available in 13253 patients

d Available in 2047 patients

e Available in 1635 patients
